# Supplementary material for: Phototransformations of TiO2/Ag2O composites and their influence on photocatalytic water splitting accompanied by methanol photoreforming
Source: Royal Society of Chemistry journal article supplement (doi:10.1039/d2na00910b), 2023-01-01
Supplement: d2na00910b1.pdf [file d2na00910b1.pdf]

### Supporting Information

#### Phototransformations of $\text{TiO}_2/\text{Ag}_2\text{O}$ composite and their influence on photocatalytic water splitting accompanied by methanol photoreforming

Anna Jakimińska, Kaja Spilarewicz, Wojciech Macyk\*

Faculty of Chemistry, Jagiellonian University, ul. Gronostajowa 2, Kraków, 30-387, Poland

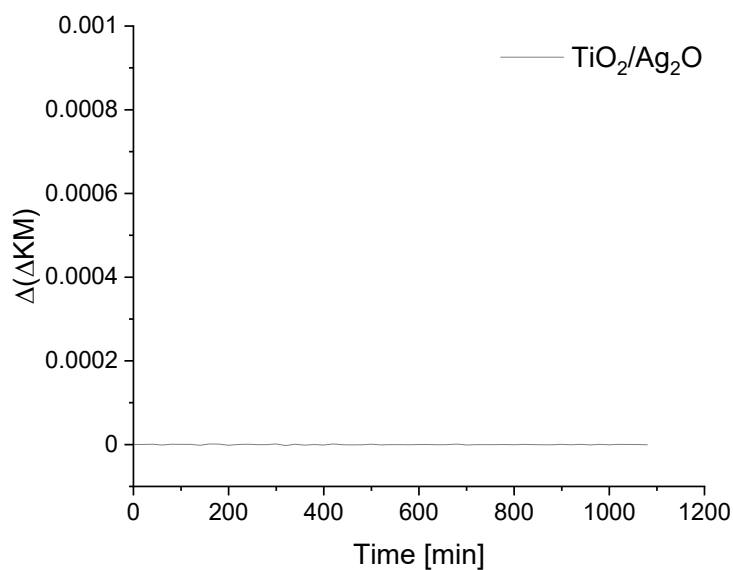

**Figure S1.** Results revealing changes in the experiment of photostability.

Photostability of the  $\text{TiO}_2/\text{Ag}_2\text{O}$  material during measurements was proven by collecting DRS spectra under the same conditions which were applied in SE-DRS tests with no potential applied. No change in the spectra proves a good photostability of the material under applied conditions. Therefore, it is clear that the spectral changes recorded during SE-DRS measurements should be attributed to the material reduction upon the potential change.

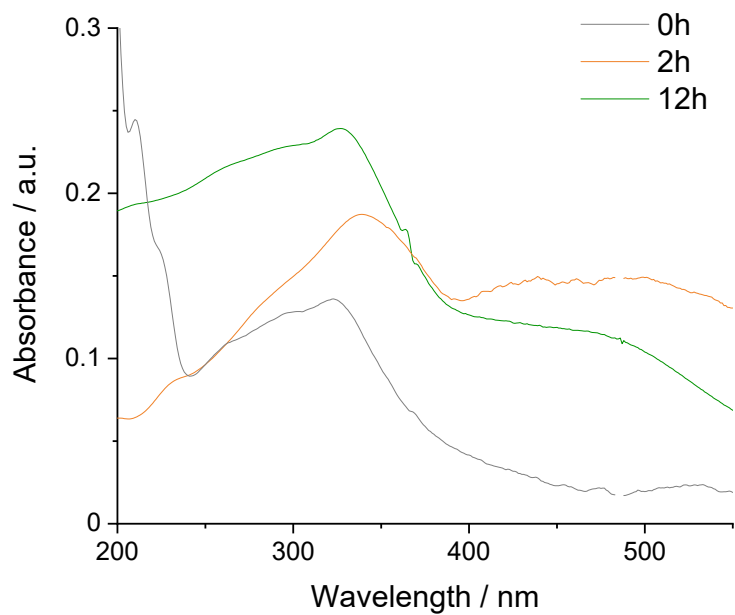

**Figure S2.** UV-Vis spectra of  $\text{TiO}_2/\text{Ag}_2\text{O}$  as-prepared, after 2 and 12 h of irradiation.

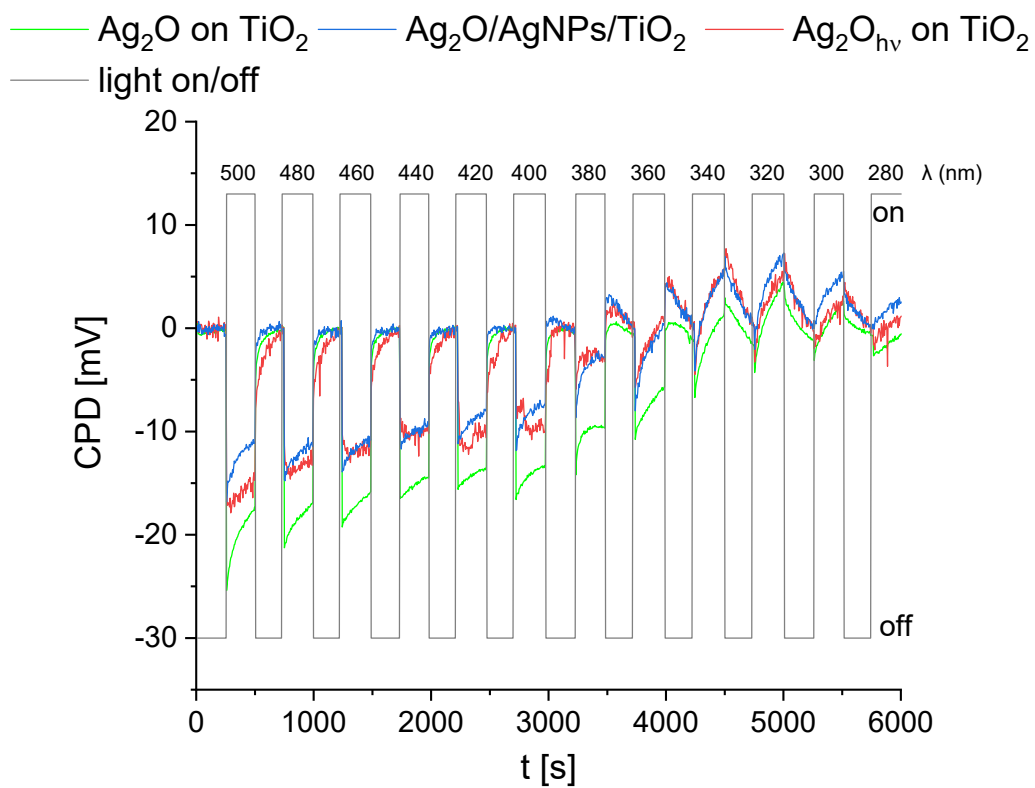

**Figure S3.** SPV for layered systems:  $\text{Ag}_2\text{O}$  on top of  $\text{TiO}_2$ ,  $\text{Ag}_2\text{O}$  on top of  $\text{TiO}_2$  and AgNPs in the middle, and  $\text{Ag}_2\text{O}_{\text{hv}}$  on top of  $\text{TiO}_2$ .

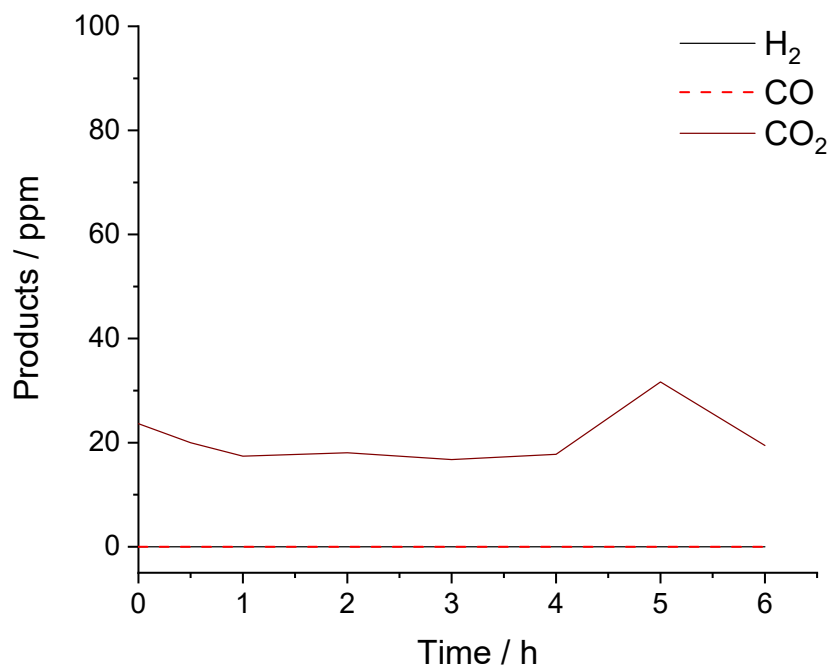

**Figure S4.** Products of water-splitting/methanol photoreforming processes resulting from bare Ag<sub>2</sub>O activity.
